# Supplementary material
Source: ML conference proceedings conference paper supplement (https://proceedings.neurips.cc/paper_files/paper/2023/hash/43a69d143273bd8215578bde887bb552-Abstract.html)
Supplement: Supplementary file 1 [file 43a69d143273bd8215578bde887bb552-Supplemental-Conference.pdf]

---

# Appendix:

## Generating Images with Multimodal Language Models

---

Anonymous Author(s)

Affiliation

Address

email

### Abstract

1 We detail current limitations of GILL, and suggest possible directions to alleviate  
2 this in future work. We also describe the broader impact of our work, including  
3 possible applications, risks, and intended uses. Finally, we provide more quantita-  
4 tive and qualitative evaluations, including results on deciding whether to retrieve  
5 or generate, results on the effect of increasing context on VisDial, text-to-image  
6 generation results on MS-COCO, and present more qualitative samples from GILL.

### 7 A Limitations

8 GILL relies on an LLM backbone for many of its capabilities. As such, it also inherits many of the  
9 limitations that are typical of LLMs. One limitation is the potential for hallucinations [2], where  
10 the model generates content that is false or not relevant to the input data. Another limitation of the  
11 model in generating text is in repetitions and neural text degeneration [12], where the model generates  
12 the same content multiple times. We also observed that the OPT-6.7B model also does not always  
13 consistently generate coherent dialogue text.

14 These limitations may be addressed by techniques that address hallucinations and degenerations in  
15 text-only LLMs, or by using improved LLMs that are less prone to these issues. In GILL, we used  
16 a 6.7B model. In the future, it will be valuable to scale up the approach with even larger LMs, or  
17 those trained with improved objectives [25], instruction finetuning [26] or human feedback [19].  
18 Depending on downstream applications, using models trained explicitly on dialogue data [7] may  
19 also be helpful for dialogue capabilities (e.g., deploying multimodal chatbots).

20 With regards to the visual models, another limitation of our approach is in its limited visual processing.  
21 At the moment, we use only  $k = 4$  visual vectors to represent each input image (due to computational  
22 constraints), which may not capture all the relevant visual information needed for downstream tasks.  
23 These vectors are produced by a frozen pre-trained visual encoder, and so the visual information in  
24 the vectors is heavily constrained by the pre-training task. As a result, the model may not always  
25 process images correctly or in enough detail to produce accurate or high-quality results. However,  
26 this limitation can potentially be addressed in the future by scaling up the visual model, using models  
27 with varied pre-training objectives that encode more visual information while still being mappable to  
28 the hidden space of the LLM, or using more sophisticated visual mappings [1, 15] that can capture a  
29 richer set of visual features. Similarly, we observed during inference that our model sometimes does  
30 not generate relevant images for certain types of prompts. We attribute this to our finetuning dataset  
31 being CC3M, which is relatively small compared to modern large scale image-text datasets [24]. It is  
32 likely that training GILLMapper on an even larger corpus of text data will improve its alignment to  
33 the image generation backbone.

34 One of the advantages of our model is that it is modular, and can benefit from stronger visual and  
35 language models released in the future. It is likely that it will also benefit from stronger text-to-image

36 generation backbones, or through finetuning the generation backbone rather than just the GILLMapper  
37 module. We leave such scaling explorations for future work.

## 38 B Broader Impact

39 **AI Assistants** Recent advances in dialogue based chatbots have sparked interest in using LLMs for  
40 interactive conversational applications. GILL is a multimodal language model capable of processing  
41 image and text inputs, and producing image and text outputs. These capabilities may enable a wider  
42 range of applications. For example, AI assistants which can produce image and text outputs would be  
43 able to answer a wider range of queries, providing visual content when necessary to illustrate certain  
44 points. Concrete applications may include creative endeavors (e.g., iteratively refining a generated  
45 image with instructions), answering questions that benefit from visual outputs (e.g., describing food  
46 items), and more. Scaling GILL and refining it with methods such as reinforcement learning from  
47 human feedback (RLHF) [14] are promising directions to improve the capabilities of multimodal AI  
48 assistant systems.

49 **Disinformation and Harms** Aside from the technical limitations detailed in Sec. A, there are  
50 broader societal issues that should be considered with the development of generative models of  
51 text and images. LLMs have the potential to generate plausible sounding (but false) text [10, 2],  
52 propagating disinformation at scale. As GILL uses an LLM backbone, it is also susceptible to  
53 these potential issues. Furthermore, as multimodal generative models which can also produce image  
54 content, models such as GILL also introduce potential issues with producing even more convincing  
55 disinformation through interleaving text with realistic generated images. As GILL makes use of an  
56 image generation backbone, it is also susceptible to the risks that typical text-to-image generation  
57 models introduce, such as generating false images of real people. These harms may possibly be  
58 mitigated by introducing watermarking into generated images [17, 28], or by deploying systems to  
59 detect generated images [5].

60 **Bias and Safety** GILL makes use of pretrained LLMs and multimodal models (such as CLIP [20]  
61 and Stable Diffusion [22]), which are trained on large, noisy, Internet-scraped data (such as LAION-  
62 400M [24]). Due to their curation process, these datasets often contain undesired biases, malignant  
63 stereotypes (see [3] for a comprehensive discussion on large scaled multimodal datasets). One  
64 advantage of GILL is that it is efficient to train and completely *modular*, allowing its components  
65 (i.e., the LLM, visual encoder, or image generator) to be swapped out for other pretrained models (for  
66 example, models which have been further calibrated to reduce unintended biases).

67 **Intended Uses** GILL is a research prototype which showcases possible capabilities of multimodal  
68 language models which can both process and produce image and text outputs. Due to the limitations  
69 described above, GILL is not in its current state intended for deployment in practical applications,  
70 especially in high risk or sensitive domains without further analysis. At its current model scale (a  
71 6.7B parameter LLM), GILL also lacks many of the abilities of larger language models [4], and  
72 applications would likely benefit from increased scaling of the LLM and visual models.

## 73 C Deciding to Generate or Retrieve

74 As detailed in Sec. 3.3 of the main paper, we evaluate several models on the annotated PartiPrompts [27] dataset. Each prompt is annotated with one of two labels: “ret” or “gen”, indicating  
75 whether image retrieval or image generation produces a more appropriate image for the corresponding  
76 prompt. For example, the prompt “*a portrait of a statue of the Egyptian god Anubis wearing aviator  
77 goggles, white t-shirt and leather jacket, flying over the city of Mars.*” is labeled as “gen”, as there are  
78 (understandably) no appropriate images in the CC3M retrieval set, and generation produces a more  
79 relevant output. In contrast, “*the geyser Old Faithful*” is labeled as “ret,” as there are very relevant  
80 candidate images available for this prompt. We evaluate several models for making this decision on  
81 the validation set (Tab. 1), evaluating using F1 score given the class imbalance of the dataset (201  
82 “gen”, 110 “ret” in the validation set labels):

84 1. **Baselines:** We measure the F1 score of several baseline methods, which provide a lower  
85 bound for how well data-driven approaches can do. We find that always retrieving an image,

Table 1: Results on PartiPrompts for classifying retrieval or generation.

| Method            | F1            |
|-------------------|---------------|
| Always retrieve   | 0.267         |
| Always generate   | 0.389         |
| Random            | 0.451         |
| Heuristic         | 0.261 – 0.559 |
| Linear classifier | 0.393 – 0.552 |
| Human performance | 0.851         |

86 always generating an image, or simply deciding randomly (with a prior proportional to class  
87 frequencies) achieve F1 scores of 0.267, 0.389, and 0.451 respectively.

88 2. **Heuristic:** We also consider a simple heuristic which considers the maximum cosine  
89 similarity of the retrieval embedding against the entire image candidate set (i.e., the training  
90 set of CC3M). We run a grid search from 0 to 1 for possible threshold values. Whenever the  
91 maximum cosine similarity is above a threshold, we return “ret” and “gen” otherwise. This  
92 achieves an F1 of 0.261 – 0.559, depending on the threshold used (a threshold of 0.5 gives  
93 F1 of 0.261).

94 3. **Linear classifier:** Lastly, we train a linear classifier that takes as input the outputs of the  
95 LLM for the [IMG] tokens and the maximum cosine similarity. This classifier is trained  
96 with the binary cross-entropy loss over the training set of PartiPrompts annotations. This  
97 linear classifier achieves an F1 score of between 0.393 – 0.552, depending on the probability  
98 threshold used (a threshold of 0.5 gives an F1 score of 0.547).

99 We use the linear classifier in our final model, as it requires less hyperparameter tuning compared  
100 to the heuristic baseline, and performs comparably on quantitative metrics. During generation of  
101 qualitative samples (Fig. 1 and Fig. 5 in the main paper), we observed that the linear classifier  
102 generally performed well for many prompts, and decided correctly whether to retrieve or generate.

## 103 D Qualitative Results

104 We present further qualitative samples in Fig. 1. We find that GILL is able to process complex  
105 text prompts more effectively than Stable Diffusion for many examples in PartiPrompts [27]. On  
106 VisDial [8] dialogue inputs, GILL is able to generate more relevant outputs (as measured against  
107 groundtruth images). We attribute these improved results to the stronger text representations of the  
108 LLM, and the effectiveness of our GILLMapper network.

## 109 E Other Evaluations

### 110 E.1 Increasing Context on VisDial

111 GILL leverages an LLM backbone, which allows it to inherit some of the LLM’s capabilities, such  
112 as improved sensitivity to long input contexts. In the main paper, we showed that GILL can better  
113 condition on longer image and text inputs to generate more relevant images for VIST [13]. We run a  
114 similar experiment on Visual Dialogue [8], varying the number of dialogue rounds provided as input  
115 context to GILL and Stable Diffusion (SD) [22].

116 The results are presented in Fig. 2. We find that when longer text context is provided to both models,  
117 the performance of generating relevant images steadily improves. Interestingly, SD performance  
118 plateaus after 6 rounds of dialogue, while GILL continues to improve, outperforming SD when 7  
119 or more rounds of dialogue are provided. These results showcase the improved sensitivity of our  
120 model to conditioning on long, dialogue-like text. Despite both approaches using the same image  
121 generation backbone, GILL is able to better make use of longer dialogue-text inputs (despite being  
122 only finetuned on image caption data).

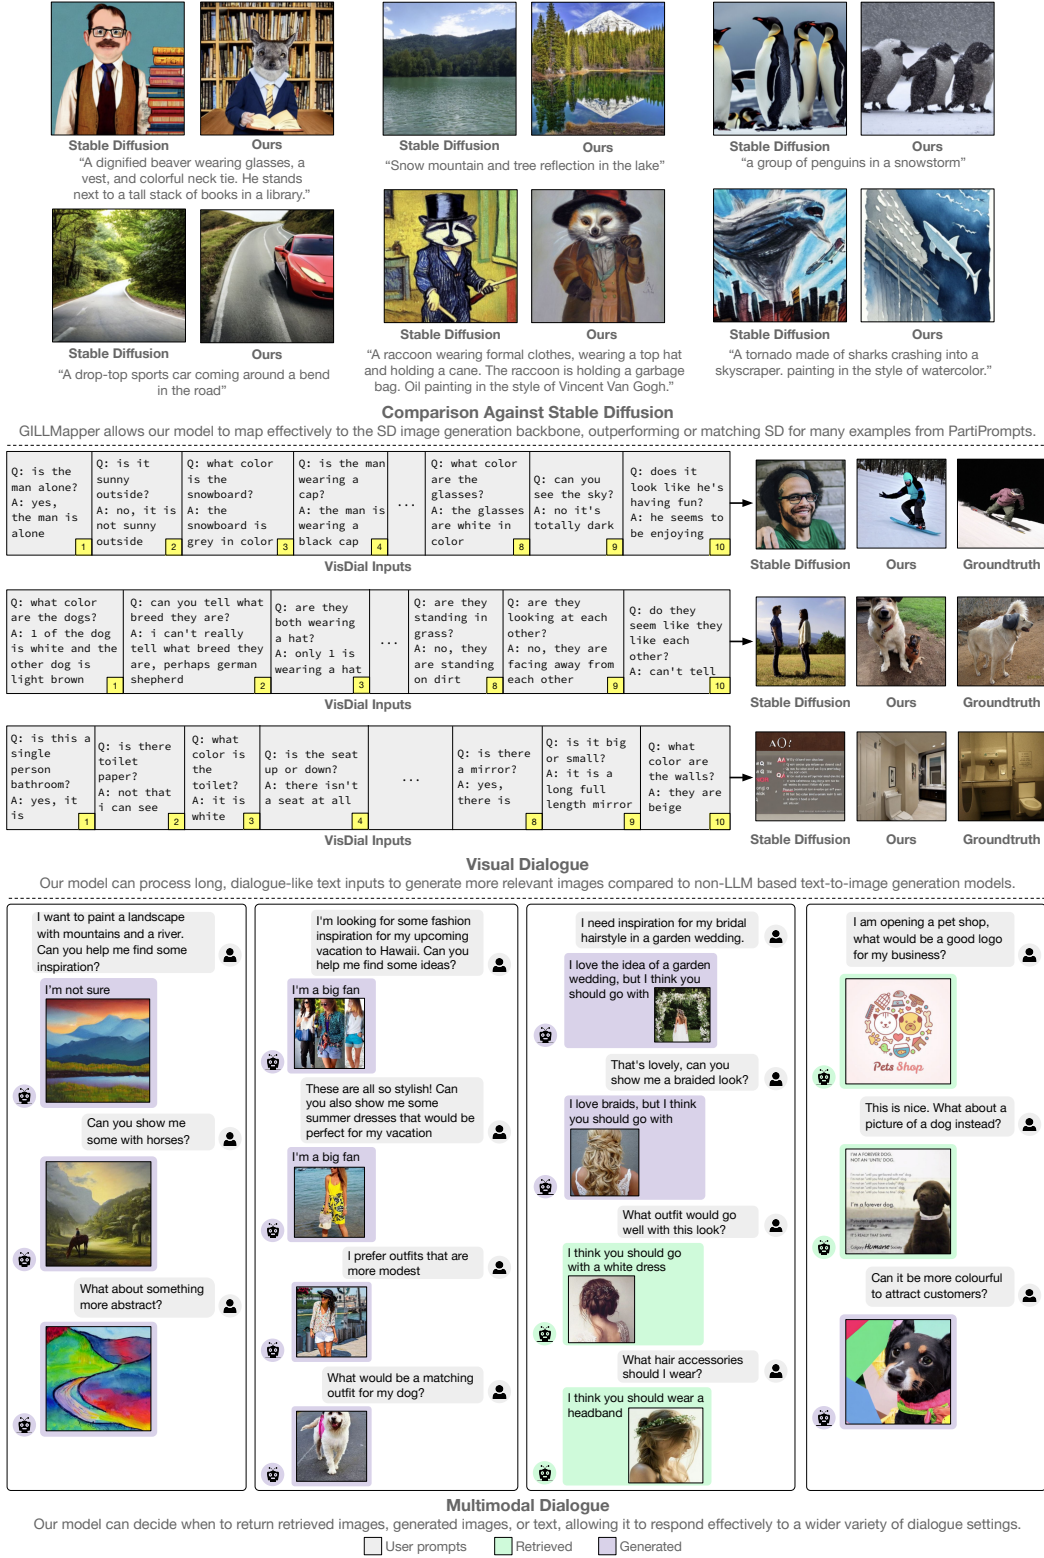

Figure 1: Further qualitative samples from GILL. It is more sensitive to text inputs due to its LLM backbone, and better at processing complex text prompts.

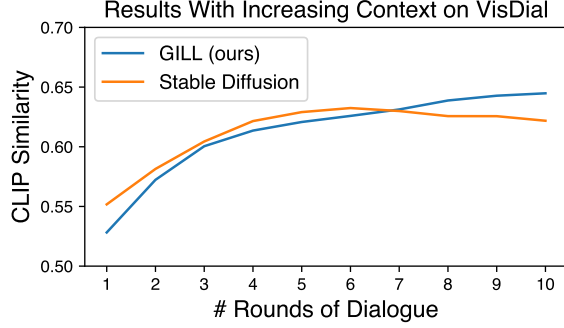

Figure 2: Performance of our model and Stable Diffusion [22] with increasing context for generating VisDial [8] images. Our model is able to better process long dialogue-like text descriptions.

Table 2: Zero-shot FID [11] on the MS-COCO [16] (2014) validation set. 30,000 random samples are used to evaluate all models.

| Model            | FID (↓) |
|------------------|---------|
| GLIDE [18]       | 12.24   |
| Make-A-Scene [9] | 11.84   |
| DALL-E 2 [21]    | 10.39   |
| LAFITE2 [29]     | 8.42    |
| Imagen [23]      | 7.27    |
| Parti [27]       | 7.23    |
| Re-Imagen [6]    | 6.88    |
| SD [22] v1.5     | 9.22    |
| GILL (ours)      | 12.2    |

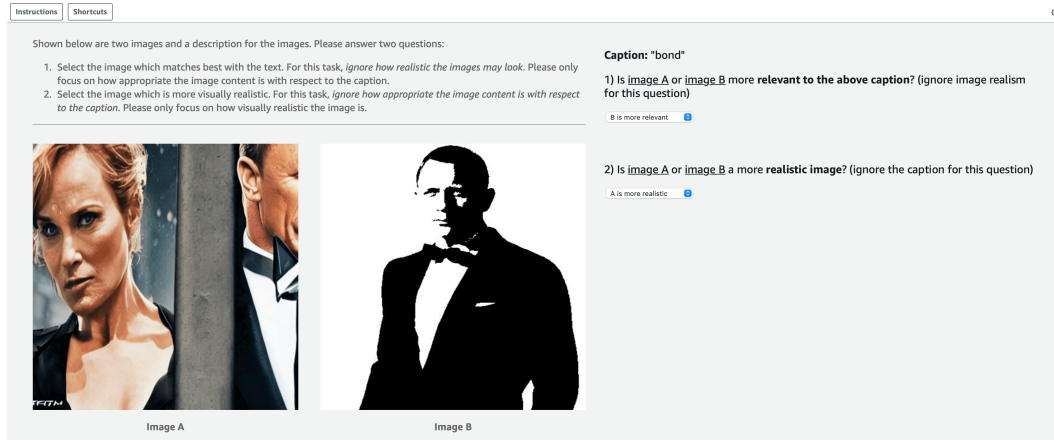

Figure 3: User interface shown to human annotators for annotating PartiPrompts [27] examples.

## E.2 Image Generation

In addition to our evaluations on VIST [13] and VisDial [8], we also run evaluations on our model’s ability to generate images from MS-COCO [16] captions (Tab. 2). We generate images using 30,000 randomly sampled captions from the MS-COCO (2014) validation set, which is the standard evaluation of text-to-image generation models. We report zero-shot FID scores [11] of our model, Stable Diffusion [22] v1.5 (which we use as our backbone image generator), and several other approaches in Tab. 2. For our generation results and SD results, we use a classifier-free guidance scaling factor of 3.0 and 250 DDIM inference steps. On MS-COCO, our approach achieves a worse FID score than SD (9.22 to 12.2). This is likely because this task does not benefit as much from the LLM backbone, which has not been trained on as many image captions as SD (which exclusively trains on caption-like data). These numbers will likely improve further by finetuning GILL on even more text data (including image captions), which will allow our model to align more closely to the input space of the SD image generator.

## F Human Annotation on PartiPrompts

In Sec. 3.3 of the main paper, we described the process of annotating PartiPrompts [27] with per-example labels to retrieve or generate. The interface shown to human annotators is shown in Fig. 3. Annotators are tasked to determine which of two anonymized images are (1) more relevant to the provided prompt, and (2) more realistic. We randomize the order of the two images as well (i.e., the output of the retrieval model shows up 50% of the time as Image A).

We show each example to 5 independent human annotators. For determining whether to label a particular example as “ret” or “gen”, we take the majority vote of the 5 annotators on the image relevance question (“Is image A or image B more relevant to the above caption?”), and only keep the examples with an inter-annotator agreement of at least 4/5. This results in approximately 900 examples remaining (out of the 1,632 examples in PartiPrompts). Our annotations will be publicly released to facilitate future evaluations on this task.

We conducted evaluations on the Amazon Mechanical Turk platform with human annotators located in the US and Canada. Annotators were paid at an estimated hourly rate of 15 USD per hour. In total, we spent approximately 326 USD to collect these annotations.

## References

- [1] Jean-Baptiste Alayrac, Jeff Donahue, Pauline Luc, Antoine Miech, Iain Barr, Yana Hasson, Karel Lenc, Arthur Mensch, Katie Millican, Malcolm Reynolds, et al. Flamingo: a visual language model for few-shot learning. *NeurIPS*, 2022.
- [2] Emily M Bender, Timnit Gebru, Angelina McMillan-Major, and Shmargaret Shmitchell. On the dangers of stochastic parrots: Can language models be too big? In *Proceedings of the 2021 ACM Conference on Fairness, Accountability, and Transparency*, pages 610–623, 2021.
- [3] Abeba Birhane, Vinay Uday Prabhu, and Emmanuel Kahembwe. Multimodal datasets: misogyny, pornography, and malignant stereotypes. *arXiv preprint arXiv:2110.01963*, 2021.
- [4] Tom Brown, Benjamin Mann, Nick Ryder, Melanie Subbiah, Jared D Kaplan, Prafulla Dhariwal, Arvind Neelakantan, Pranav Shyam, Girish Sastry, Amanda Askell, et al. Language models are few-shot learners. *NeurIPS*, 2020.
- [5] Keshigeyan Chandrasegaran, Ngoc-Trung Tran, Alexander Binder, and Ngai-Man Cheung. Discovering transferable forensic features for cnn-generated images detection. In *ECCV*, 2022.
- [6] Wenhui Chen, Hexiang Hu, Chitwan Saharia, and William W Cohen. Re-imagen: Retrieval-augmented text-to-image generator. *arXiv preprint arXiv:2209.14491*, 2022.
- [7] Wei-Lin Chiang, Zhuohan Li, Zi Lin, Ying Sheng, Zhanghao Wu, Hao Zhang, Lianmin Zheng, Siyuan Zhuang, Yonghao Zhuang, Joseph E. Gonzalez, Ion Stoica, and Eric P. Xing. Vicuna: An open-source chatbot impressing gpt-4 with 90%\* chatgpt quality, March 2023.
- [8] Abhishek Das, Satwik Kottur, Khushi Gupta, Avi Singh, Deshraj Yadav, José MF Moura, Devi Parikh, and Dhruv Batra. Visual dialog. In *CVPR*, 2017.
- [9] Oran Gafni, Adam Polyak, Oron Ashual, Shelly Sheynin, Devi Parikh, and Yaniv Taigman. Make-a-scene: Scene-based text-to-image generation with human priors. In *ECCV*, 2022.
- [10] Samuel Gehman, Suchin Gururangan, Maarten Sap, Yejin Choi, and Noah A Smith. Realltoxicityprompts: Evaluating neural toxic degeneration in language models. *EMNLP*, 2020.
- [11] Martin Heusel, Hubert Ramsauer, Thomas Unterthiner, Bernhard Nessler, and Sepp Hochreiter. Gans trained by a two time-scale update rule converge to a local nash equilibrium. *NeurIPS*, 2017.
- [12] Ari Holtzman, Jan Buys, Li Du, Maxwell Forbes, and Yejin Choi. The curious case of neural text degeneration. *ICLR*, 2020.
- [13] Ting-Hao Huang, Francis Ferraro, Nasrin Mostafazadeh, Ishan Misra, Aishwarya Agrawal, Jacob Devlin, Ross Girshick, Xiaodong He, Pushmeet Kohli, Dhruv Batra, et al. Visual storytelling. In *NAACL-HLT*, 2016.
- [14] Nathan Lambert, Louis Casticato, Leandro von Werra, and Alex Havrilla. Illustrating reinforcement learning from human feedback (rlhf). *Hugging Face Blog*, 2022. <https://huggingface.co/blog/rlhf>.
- [15] Junnan Li, Dongxu Li, Silvio Savarese, and Steven Hoi. Blip-2: Bootstrapping language-image pre-training with frozen image encoders and large language models. *ICML*, 2023.

- 189 [16] Tsung-Yi Lin, Michael Maire, Serge Belongie, James Hays, Pietro Perona, Deva Ramanan,  
190 Piotr Dollár, and C Lawrence Zitnick. Microsoft coco: Common objects in context. *ECCV*,  
191 2014.
- 192 [17] Xiyang Luo, Ruohan Zhan, Huiwen Chang, Feng Yang, and Peyman Milanfar. Distortion  
193 agnostic deep watermarking. In *CVPR*, 2020.
- 194 [18] Alex Nichol, Prafulla Dhariwal, Aditya Ramesh, Pranav Shyam, Pamela Mishkin, Bob McGrew,  
195 Ilya Sutskever, and Mark Chen. Glide: Towards photorealistic image generation and editing  
196 with text-guided diffusion models. *ICML*, 2022.
- 197 [19] Long Ouyang, Jeff Wu, Xu Jiang, Diogo Almeida, Carroll L Wainwright, Pamela Mishkin,  
198 Chong Zhang, Sandhini Agarwal, Katarina Slama, Alex Ray, et al. Training language models to  
199 follow instructions with human feedback. *NeurIPS*, 2022.
- 200 [20] Alec Radford, Jong Wook Kim, Chris Hallacy, Aditya Ramesh, Gabriel Goh, Sandhini Agarwal,  
201 Girish Sastry, Amanda Askell, Pamela Mishkin, Jack Clark, et al. Learning transferable visual  
202 models from natural language supervision. In *ICML*, 2021.
- 203 [21] Aditya Ramesh, Prafulla Dhariwal, Alex Nichol, Casey Chu, and Mark Chen. Hierarchical  
204 text-conditional image generation with clip latents. *arXiv preprint arXiv:2204.06125*, 2022.
- 205 [22] Robin Rombach, Andreas Blattmann, Dominik Lorenz, Patrick Esser, and Björn Ommer.  
206 High-resolution image synthesis with latent diffusion models. In *CVPR*, 2022.
- 207 [23] Chitwan Saharia, William Chan, Saurabh Saxena, Lala Li, Jay Whang, Emily L Denton, Kamyar  
208 Ghasemipour, Raphael Gontijo Lopes, Burcu Karagol Ayan, Tim Salimans, et al. Photorealistic  
209 text-to-image diffusion models with deep language understanding. *NeurIPS*, 2022.
- 210 [24] Christoph Schuhmann, Richard Vencu, Romain Beaumont, Robert Kaczmarczyk, Clayton  
211 Mullis, Aarush Katta, Theo Coombes, Jenia Jitsev, and Aran Komatsuzaki. Laion-400m: Open  
212 dataset of clip-filtered 400 million image-text pairs. *arXiv preprint arXiv:2111.02114*, 2021.
- 213 [25] Yi Tay, Mostafa Dehghani, Vinh Q Tran, Xavier Garcia, Dara Bahri, Tal Schuster,  
214 Huaixiu Steven Zheng, Neil Houlsby, and Donald Metzler. Unifying language learning  
215 paradigms. *arXiv preprint arXiv:2205.05131*, 2022.
- 216 [26] Jason Wei, Maarten Bosma, Vincent Y Zhao, Kelvin Guu, Adams Wei Yu, Brian Lester, Nan  
217 Du, Andrew M Dai, and Quoc V Le. Finetuned language models are zero-shot learners. *ICLR*,  
218 2022.
- 219 [27] Jiahui Yu, Yuanzhong Xu, Jing Yu Koh, Thang Luong, Gunjan Baid, Zirui Wang, Vijay  
220 Vasudevan, Alexander Ku, Yinfei Yang, Burcu Karagol Ayan, et al. Scaling autoregressive  
221 models for content-rich text-to-image generation. *TMLR*, 2022.
- 222 [28] Yunqing Zhao, Tianyu Pang, Chao Du, Xiao Yang, Ngai-Man Cheung, and Min Lin. A recipe  
223 for watermarking diffusion models. *arXiv preprint arXiv:2303.10137*, 2023.
- 224 [29] Yufan Zhou, Chunyuan Li, Changyou Chen, Jianfeng Gao, and Jinhui Xu. Lafite2: Few-shot  
225 text-to-image generation. *arXiv preprint arXiv:2210.14124*, 2022.
